# Supplementary material for: Required Gene Set for Autotrophic Growth of Clostridium autoethanogenum
Source: PubMed Central journal article supplement (PMC9004356; doi:10.1128/aem.02479-21), 2022-03-14
Supplement: aem.02479-21-s0001.pdf [file aem.02479-21-s0001.pdf]

## SUPPLEMENTARY INFORMATION

### **Application of transposon-insertion sequencing to determine gene essentiality in the acetogen *Clostridium autoethanogenum***

Craig Woods<sup>1</sup>, Christopher M. Humphreys<sup>1</sup>, Claudio Tomi-Andrino<sup>1,2,3</sup>, Anne M. Henstra<sup>1</sup>,  
Michael Köpke<sup>4</sup>, Sean D. Simpson<sup>4</sup>, Klaus Winzer<sup>1</sup>, Nigel P. Minton<sup>1,5</sup>

<sup>1</sup> Clostridia Research Group, BBSRC/EPSRC Synthetic Biology Research Centre (SBRC),  
Biodiscovery Institute, School of Life Sciences, The University of Nottingham, Nottingham,  
NG7 2RD, UK

<sup>2</sup> Centre for Analytical Bioscience, Advanced Materials and Healthcare Technologies  
Division, School of Pharmacy, The University of Nottingham, Nottingham, NG7 2RD, UK

<sup>3</sup> BBSRC/EPSRC Synthetic Biology Research Centre (SBRC), School of Mathematical Sciences,  
The University of Nottingham, Nottingham, NG7 2RD, UK

<sup>4</sup> LanzaTech Inc., 8045 Lamon Avenue, Suite 400, Skokie, IL, USA

<sup>5</sup> NIHR Nottingham Biomedical Research Centre, Nottingham University Hospitals NHS Trust  
and the University of Nottingham, Nottingham, NG7 2RD, UK.

Correspondence and requests for materials should be addressed to Professor Nigel P Minton  
(email: [nigel.minton@nottingham.ac.uk](mailto:nigel.minton@nottingham.ac.uk))

## EXPERIMENTAL

### **Table S1: Essentiality status for each gene in the *C. autoethanogenum* genome. – see attached Excel File**

Transposon libraries were tracked while passaged through rich medium, minimal medium with pyruvate as the carbon source, and finally minimal medium with CO as the carbon source. For each of these conditions a call is made on the essentiality status on each gene in *C. autoethanogenum*. If a gene was predicted to be essential on a previous growth condition then no assertion is made on the subsequent condition, the hyphen should be interpreted to mean an absence of a call being made on the essentiality status.

### **Table S2: Comparison of essentiality status calls from flux-balance analysis and transposon sequencing data.**

A comparison of the essentiality status for the 534 genes considered in a genome scale model <sup>1</sup> of *C. autoethanogenum* as determined by flux-balance analysis and by the transposon sequencing experimental data.

## ANALYTICS

**Table S3:** Bioreactor run data

The pyruvate concentration of the fermentation medium was measured via HPLC in order to accurately determine when autotrophic growth was occurring. Pyruvate was added to the initial fermentation broth in order to avoid unwanted bottleneck effects after inoculation of the transposon library.

| Date (DD/MM/YYYY)        | Elapsed Time | Pyruvate Concentration (mM) | Optical Density |
|--------------------------|--------------|-----------------------------|-----------------|
| 29/11/2017 (Inoculation) | 0            | -                           | -               |
| 30/11/2017               | 24           | 12.56                       | -               |
| 02/12/2017               | 48           | 0.07                        | -               |
| 03/12/2017               | 72           | 0.05                        | 0.218           |
| 04/12/2017               | 96           | 0.03                        | 0.345           |
| 05/12/2017               | 120          | 0.04                        | 0.403           |
| 06/12/2017               | 144          | 0.05                        | 0.418           |
| 07/12/2017               | 168          | 0.06                        | 0.423           |
| 08/12/2017               | 192          | 0.06                        | 0.487           |
| 09/12/2017               | 216          | 0.06                        | 0.579           |
| 10/12/2017               | 240          | 0.05                        | 0.725           |
| 11/12/2017               | 264          | 0.04                        | 0.928           |
| 12/12/2017               | 288          | 0.08                        | 1.252           |
| 13/12/2017               | 312          | 0.06                        | 1.559           |
| 14/12/2017               | 336          | 0.03                        | 1.687           |
| 15/12/2017               | 360          | 0.03                        | 2.358           |
| 16/12/2017               | 384          | 0.02                        |                 |

## MEDIA

**Table S4: YTF Medium**

Components from the table were added to a stirred vessel containing the desired volume double-distilled H<sub>2</sub>O in the order that they appear in the table after which the pH was set to 5.8 using concentrated HCl.

| Component                          | Quantity per litre |
|------------------------------------|--------------------|
| Yeast Extract                      | 10 g               |
| Tryptone                           | 16 g               |
| Fructose                           | 10 g               |
| NaCl                               | 0.2 g              |
| Acid 1000x trace element solution  | 1 ml               |
| Basic 1000x trace element solution | 1 ml               |
| Vitamin 1000x stock solution       | 1 ml               |

**Table S5: YTF Media Acid 1000x Trace element solution.**

Components from the table were added to a stirred vessel containing the desired volume double-distilled H<sub>2</sub>O in the order that they appear in the table.

| Component                                              | Concentration |
|--------------------------------------------------------|---------------|
| HCl                                                    | 50 mM         |
| H <sub>3</sub> BO <sub>3</sub>                         | 100 mg/L      |
| MnCl <sub>2</sub> .4H <sub>2</sub> O                   | 230 mg/L      |
| FeCl <sub>2</sub> .4H <sub>2</sub> O                   | 78 mg/L       |
| CoCl <sub>2</sub> .6H <sub>2</sub> O                   | 103 mg/L      |
| NiCl <sub>2</sub> .6H <sub>2</sub> O                   | 602 mg/L      |
| ZnCl <sub>2</sub>                                      | 78 mg/L       |
| CuSO <sub>4</sub> .5H <sub>2</sub> O                   | 50 mg/L       |
| AlK(SO <sub>4</sub> ) <sub>2</sub> .12H <sub>2</sub> O | 50 mg/L       |

**Table S6: YTF Media 1000x basic trace element solution.**

Components from the table were added to a stirred vessel containing the desired volume double-distilled H<sub>2</sub>O in the order that they appear in the table.

| Component                                           | Quantity |
|-----------------------------------------------------|----------|
| NaOH                                                | 10 mM    |
| Na <sub>2</sub> SeO <sub>3</sub>                    | 58 mg/L  |
| Na <sub>2</sub> WO <sub>4</sub>                     | 53 mg/L  |
| Na <sub>2</sub> MbO <sub>4</sub> ·2H <sub>2</sub> O | 52 mg/L  |

**Table S7: YTF Media Vitamin 1000x stock solution.**

Components from the table were added to a stirred vessel containing the desired volume double-distilled H<sub>2</sub>O in the order that they appear in the table.

| Component              | Concentration mg/L |
|------------------------|--------------------|
| p-aminobenzoate        | 114                |
| Riboflavin             | 104                |
| Thiamine               | 200                |
| Nicotinate             | 206                |
| Pyridoxin              | 510                |
| Pantothenate (calcium) | 104                |
| Cyanocobalamin         | 78                 |
| d-biotin               | 22                 |
| Folate                 | 48                 |
| Lipoate/thioctic acid  | 50                 |

**Table S8: PETC Medium.**

Components from the table were added to a stirred vessel containing the desired volume of double-distilled H<sub>2</sub>O in the order that they appear in the table after which the pH of the solution was set to pH 5.8 using concentrated NaOH.

| Component                                                                            | Concentration (g/L) |
|--------------------------------------------------------------------------------------|---------------------|
| NH <sub>4</sub> Cl                                                                   | 1.00 g/L            |
| KCl                                                                                  | 0.10 g/L            |
| MgSO <sub>4</sub> .7H <sub>2</sub> O                                                 | 0.20 g/L            |
| KH <sub>2</sub> PO <sub>4</sub>                                                      | 0.20 g/L            |
| CaCl <sub>2</sub>                                                                    | 0.02 g/L            |
| Nitrilotriacetic Acid                                                                | 0.05 g/L            |
| Fe(SO <sub>4</sub> ) <sub>2</sub> (NH <sub>4</sub> ) <sub>2</sub> .6H <sub>2</sub> O | 0.05 g/L            |
| CH <sub>3</sub> COONa                                                                | 0.25 g/L            |
| MES buffer                                                                           | 20.00 g/L           |
| Trace metals stock (100x)                                                            | 1% (v/v)            |
| Wolfes vitamins stock (100x)                                                         | 1% (v/v)            |
| Resazurin stock (2 gL <sup>-1</sup> ) (2000x)                                        | 0.05% (v/v)         |

**Table S9: PETC Medium Trace metal solution (100X)**

The desired end volume of double-distilled H<sub>2</sub>O was added to a stirred vessel before being set to pH 6 with concentrated KOH. Components were then added in the order that they appear in the table.

| Trace metal solution (100X)                                                           | Grams per litre |
|---------------------------------------------------------------------------------------|-----------------|
| Nitrilotriacetic Acid                                                                 | 2.00            |
| MnSO <sub>4</sub> .H <sub>2</sub> O                                                   | 1.00            |
| Fe (SO <sub>4</sub> ) <sub>2</sub> (NH <sub>4</sub> ) <sub>2</sub> .6H <sub>2</sub> O | 0.80            |
| CoCl <sub>2</sub> .6H <sub>2</sub> O                                                  | 0.20            |
| ZnSO <sub>4</sub> .7H <sub>2</sub> O                                                  | 0.0002          |
| CuCl <sub>2</sub> .2H <sub>2</sub> O                                                  | 0.02            |
| NaMoO <sub>4</sub> .2H <sub>2</sub> O                                                 | 0.02            |
| Na <sub>2</sub> SeO <sub>3</sub>                                                      | 0.02            |
| NiCl <sub>2</sub> .6H <sub>2</sub> O                                                  | 0.02            |
| Na <sub>2</sub> WO <sub>4</sub> .2H <sub>2</sub> O                                    | 0.02            |

**Table S10: PETC Medium Wolfe's vitamin solution (100x)**

Components from the table were added in order to a stirred vessel containing double-distilled H<sub>2</sub>O

| <b>Wolfe's vitamin solution (100x)</b> | <b>Grams per litre</b> |
|----------------------------------------|------------------------|
| Biotin                                 | 0.004                  |
| Folic acid                             | 0.004                  |
| Pyridoxine hydrochloride               | 0.002                  |
| Thiamine.HCl                           | 0.010                  |
| Riboflavin                             | 0.010                  |
| Nicotinic acid                         | 0.010                  |
| Calcium D-(+)-pantothenate             | 0.010                  |
| Vitamin B12                            | 0.0002                 |
| p-Aminobenzoic acid                    | 0.010                  |
| Thioctic acid                          | 0.010                  |

**Table S11: Fermentation Medium.**

Components were added to a stirred vessel containing the desired volume of double-distilled H<sub>2</sub>O in the order that they appear in the table.

| Media component                                | Amount per 1.0 L |
|------------------------------------------------|------------------|
| MgCl <sub>2</sub> .6H <sub>2</sub> O           | 0.5 g            |
| CaCl <sub>2</sub> .2H <sub>2</sub> O           | 0.37 g           |
| KCl                                            | 0.15 g           |
| NaCl                                           | 0.12 g           |
| 85% H <sub>3</sub> P <sub>0</sub> <sub>4</sub> | 0.38ml           |
| NH <sub>4</sub> Cl                             | 1 g              |
| Metal mix 1                                    | 1 ml             |
| Metal mix 2                                    | 0.2 ml           |
| Tungsten solution                              | 0.2 ml           |
| Rezasurin (2 g/L)                              | 0.5 ml           |
| B-vitamin solution                             | 10 ml            |

**Table S12: Fermentation Medium Metal Mix 1 solution**

Components from the table were added to a stirred vessel containing double-distilled H<sub>2</sub>O

| Component of stock                   | Amount per 1 L |
|--------------------------------------|----------------|
| FeCl <sub>2</sub> .4H <sub>2</sub> O | 19.35 g        |
| NiCl <sub>2</sub> .6H <sub>2</sub> O | 1.19 g         |
| ZnCl <sub>2</sub>                    | 0.69 g         |

**Table S13: Fermentation Medium Metal Mix 2 solution**

Components from the table were added to a stirred vessel containing double-distilled H<sub>2</sub>O

| Component of stock                    | Amount per 1 L |
|---------------------------------------|----------------|
| CoCl <sub>2</sub>                     | 2.38 g         |
| HBO <sub>4</sub>                      | 0.62 g         |
| MnCl <sub>2</sub> .4H <sub>2</sub> O  | 1.98 g         |
| NaMoO <sub>4</sub> .2H <sub>2</sub> O | 2.42 g         |
| Na <sub>2</sub> SeO <sub>3</sub>      | 1.73 g         |

## Reference

1. Norman R, Millat T, Schatschneider S, Henstra AM, Breitkopf R, Pander B, Annan FJ, Piatek P, Hartman HB, Poolman MG, Fell DA, Winzer K, Minton NP, Hodgman C. Genome-scale model of *C. autoethanogenum* reveals optimal bioprocess conditions for high-value chemical production from carbon monoxide. *Eng. Biol.* **3**, 32–40 (2019).
